# Supplementary material for: A novel Fe3C/graphitic carbon composite with electromagnetic wave absorption properties in the C-band
Source: Royal Society of Chemistry journal article supplement (doi:10.1039/c5ra08623j), 2015-01-01
Supplement: c5ra08623j1.pdf [file c5ra08623j1.pdf]

## Electronic Supplementary Information (ESI)

### A novel Fe<sub>3</sub>C/graphitic carbon composite for electromagnetic wave absorption properties in C-band

Buhe Bateer<sup>a,b</sup>, Lei Wang<sup>a,\*</sup>, Lu Zhao<sup>a</sup>, Peng Yu<sup>a</sup>, Chungui Tian<sup>a</sup>, Kai Pan<sup>a</sup>,  
Honggang Fu<sup>a,\*</sup>

<sup>a</sup> Key Laboratory of Functional Inorganic Material Chemistry, Ministry of Education of the People's Republic of China, Heilongjiang University, 74 Xuefu Road, Nangang District, Harbin 150080, PRChina

<sup>b</sup> College of Materials and Chemical Engineering, Heilongjiang Institute of Technology, 999 Hongqi Street, Xiangfang District, Harbin 150050, PR China

#### 1. Raman spectra of three composites

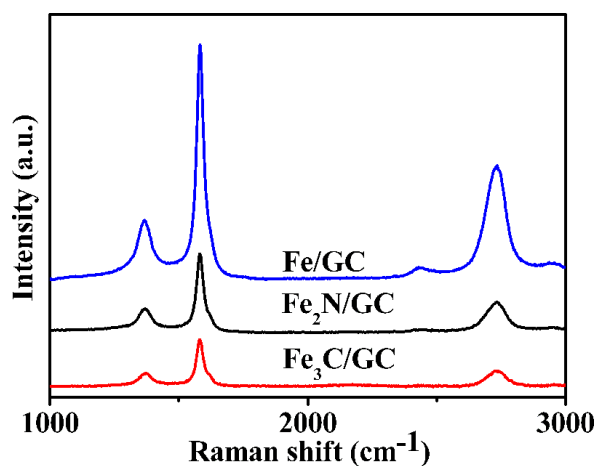

**Fig. S1.** Raman spectra of (a) Fe<sub>3</sub>C/GC, (b) Fe/GC and (c) Fe<sub>2</sub>N/GC composites.

## 2. Magnetic hysteresis curves of three composites

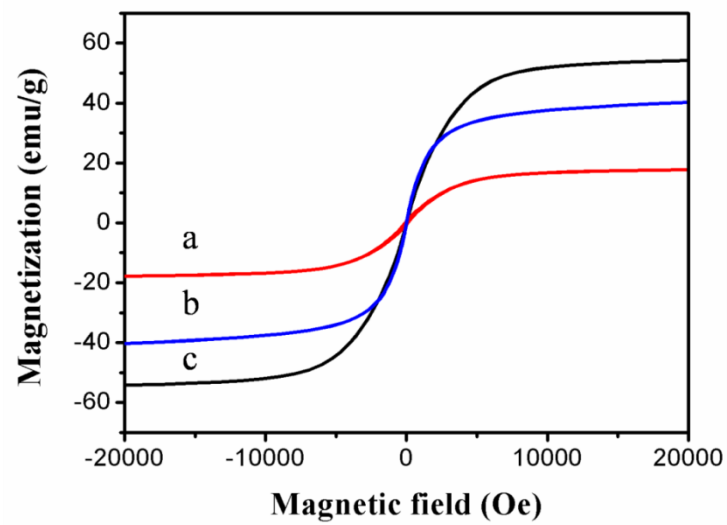

**Fig. S2.** Magnetic hysteresis curves of the composite at 300K: (a)  $\text{Fe}_3\text{C}/\text{GC}$ , (b)  $\text{Fe}_2\text{N}/\text{GC}$  and (c)  $\text{Fe}/\text{GC}$ .

### 3. TG analyses results of three samples

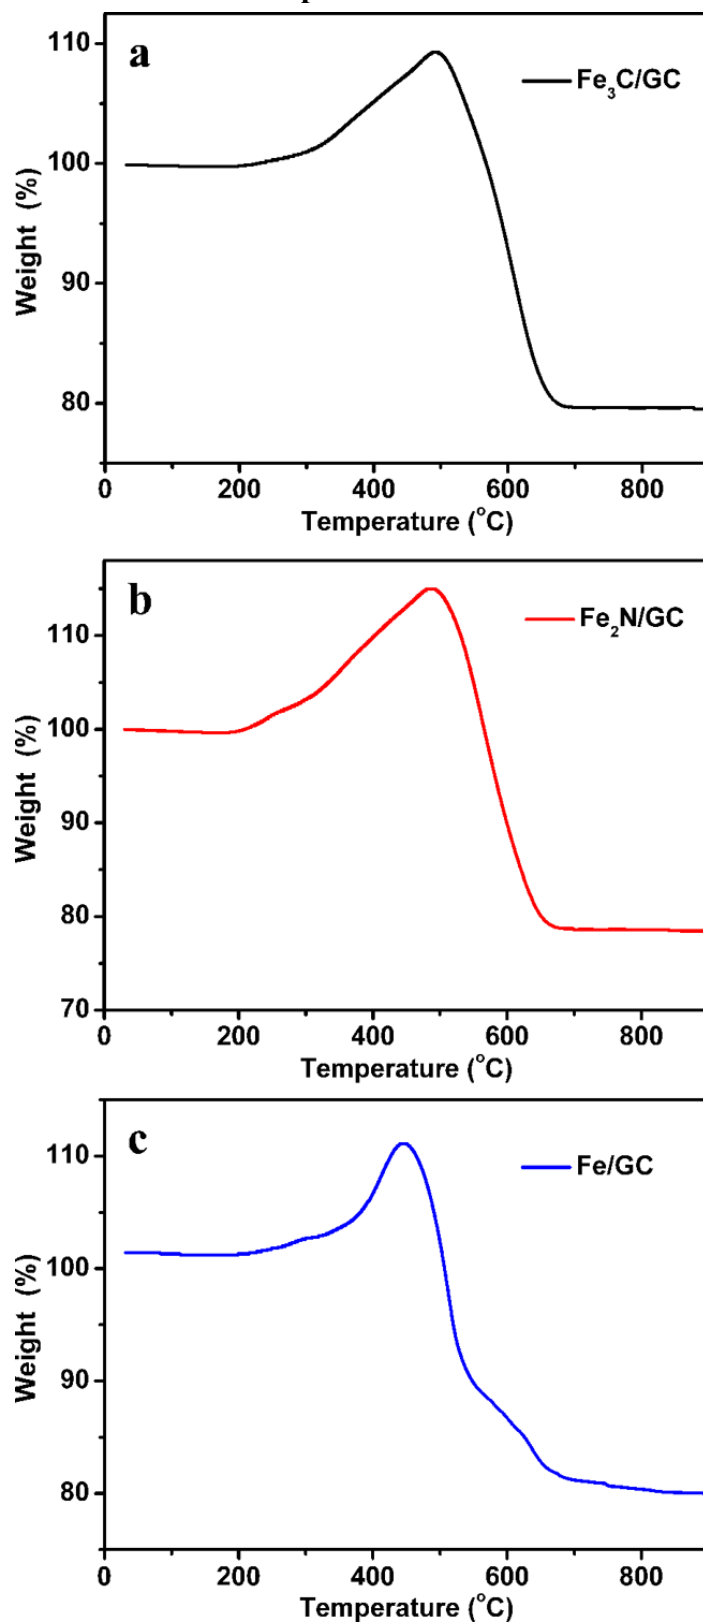

**Fig. S3.** TG curves of the (a)  $\text{Fe}_3\text{C}/\text{GC}$ , (b)  $\text{Fe}/\text{GC}$  and (c)  $\text{Fe}_2\text{N}/\text{GC}$  composites tested in air.

**Table S1** TG analyses results derived from Fig. S3.

| Sample               | Final residual mass<br>after TG tests<br>(Fe <sub>2</sub> O <sub>3</sub> , %) | Fe content<br>(%) | Iron species<br>content  | GC content<br>(%) |
|----------------------|-------------------------------------------------------------------------------|-------------------|--------------------------|-------------------|
| Fe <sub>3</sub> C/GC | 79.6                                                                          | 55.7              | 59.7 % Fe <sub>3</sub> C | 40.3              |
| Fe <sub>2</sub> N/GC | 78.5                                                                          | 55.0              | 61.9 % Fe <sub>2</sub> N | 38.1              |
| Fe/GC                | 79.8                                                                          | 55.9              | 55.9 % Fe                | 44.1              |
